# Supplementary material for: Silver Nanoparticles Loaded on Polyethylene Terephthalate Films Grafted with Chitosan
Source: MDPI journal article supplement (doi:10.3390/polym15010125), 2022-12-28
Supplement: s1 [file s1]

# Supplementary Materials

## Silver Nanoparticles Loaded on Polyethylene Terephthalate Films Grafted with Chitosan

Guadalupe Gabriel Flores-Rojas <sup>1</sup>, Felipe López-Saucedo <sup>2</sup>, Ricardo Vera-Graziano <sup>3</sup>, Héctor Magaña <sup>4</sup>, Eduardo Mendizábal <sup>1,\*</sup> and Emilio Bucio <sup>2,\*</sup>

<sup>1</sup> Departamento de Química e Ingeniería Química, Centro Universitario de Ciencias Exactas e Ingenierías, Universidad de Guadalajara, Blvd. M. García Barragán # 1451, Guadalajara 44430, Jalisco, Mexico

<sup>2</sup> Departamento de Química de Radiaciones y Radioquímica, Instituto de Ciencias Nucleares, Universidad Nacional Autónoma de México, Circuito Exterior, Ciudad Universitaria, Mexico City 04510, Mexico

<sup>3</sup> Instituto de Investigaciones en Materiales, Universidad Nacional Autónoma de México, Circuito Exterior, Ciudad Universitaria, Mexico City 04510, Mexico

<sup>4</sup> Facultad de Ciencias Químicas e Ingeniería, Universidad Autónoma de Baja California, Calzada Universidad # 14418, Parque Industrial Internacional Tijuana, Tijuana 22390, Mexico

\* Correspondence: lalomendizabal@hotmail.com (E.M.); ebucio@nucleares.unam.mx (E.B.)

### WORKSHEET 1

One-way ANOVA: Control, PET, PTN, PTC, PETC, PETCAg-500, PETCAg-1000, PETCAg-3000, PETCAg-5000

#### Method

| Null hypothesis                                | All means are equal     |
|------------------------------------------------|-------------------------|
| Alternative hypothesis                         | Not all means are equal |
| Significance level                             | $\alpha = 0.05$         |
| Equal variances were assumed for the analysis. |                         |

#### Factor Information

| Factor | Levels | Values                                                                         |
|--------|--------|--------------------------------------------------------------------------------|
| Factor | 9      | Control, PET, PTC, PTI, PTN, PETCAg-500, PETCAg-1000, PETCAg-3000, PETCAg-5000 |

Table S1. Analysis of Variance.

| Source | DF | Adj SS | Adj MS | F-Value | P-Value |
|--------|----|--------|--------|---------|---------|
| Factor | 8  | 2848.8 | 356.10 | 10.14   | 0.000   |
| Error  | 18 | 632.3  | 35.13  |         |         |
| Total  | 26 | 3481.1 |        |         |         |

Table S2. Model Summary.

| S       | R-sq   | R-sq(adj) | R-sq(pred) |
|---------|--------|-----------|------------|
| 5.92681 | 81.84% | 73.76%    | 59.13%     |

**Table S3.** Means.

| Factor      | N | Mean   | StDev | 95% CI           |
|-------------|---|--------|-------|------------------|
| Control     | 3 | 100.00 | 8.00  | (92.81, 107.19)  |
| PET         | 3 | 85.100 | 1.600 | (77.911, 92.289) |
| PTC         | 3 | 74.93  | 8.80  | (67.74, 82.12)   |
| PTI         | 3 | 83.60  | 3.50  | (76.41, 90.79)   |
| PTN         | 3 | 82.20  | 2.90  | (75.01, 89.39)   |
| PETCAg-500  | 3 | 75.80  | 5.00  | (68.61, 82.99)   |
| PETCAg-1000 | 3 | 59.00  | 9.20  | (51.81, 66.19)   |
| PETCAg-3000 | 3 | 85.00  | 3.40  | (77.81, 92.19)   |
| PETCAg-5000 | 3 | 80.00  | 5.50  | (72.81, 87.19)   |

Pooled StDev = 5.92681

### Fisher Pairwise Comparisons

**Table S4.** Grouping Information Using the Fisher LSD Method and 95% Confidence.

| Factor         | N        | Mean   | Grouping |
|----------------|----------|--------|----------|
| <b>Control</b> | <b>3</b> | 100.00 | A        |
| PET            | 3        | 85.100 | B        |
| PETCAg-3000    | 3        | 85.00  | B        |
| PTI            | 3        | 83.60  | B        |
| PTN            | 3        | 82.20  | B        |
| PETCAg-5000    | 3        | 80.00  | B        |
| PETCAg-500     | 3        | 75.80  | B        |
| PTC            | 3        | 74.93  | B        |
| PETCAg-1000    | 3        | 59.00  | C        |

Means that do not share a letter are significantly different.

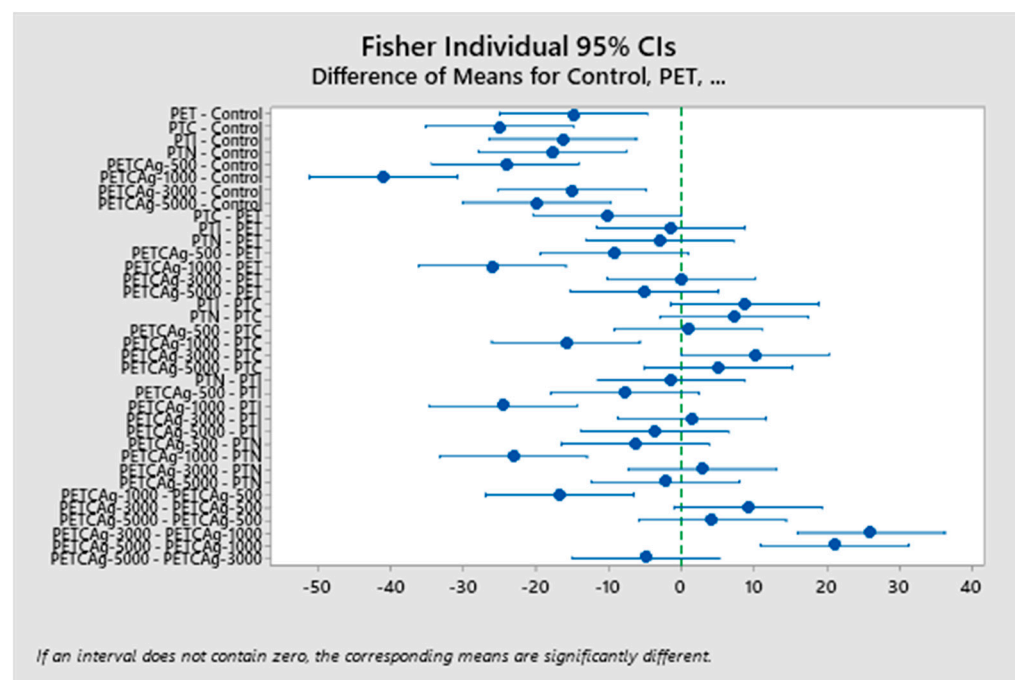

**Figure S1.** Fisher individual 95 %.

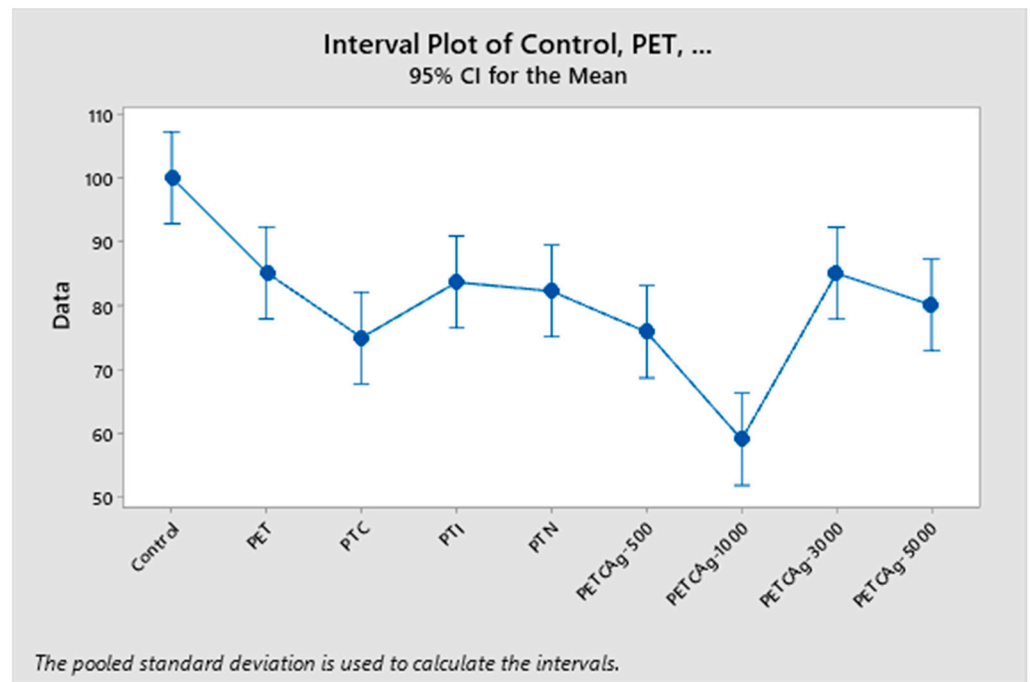

**Figure S2.** Interval plot of control PET.

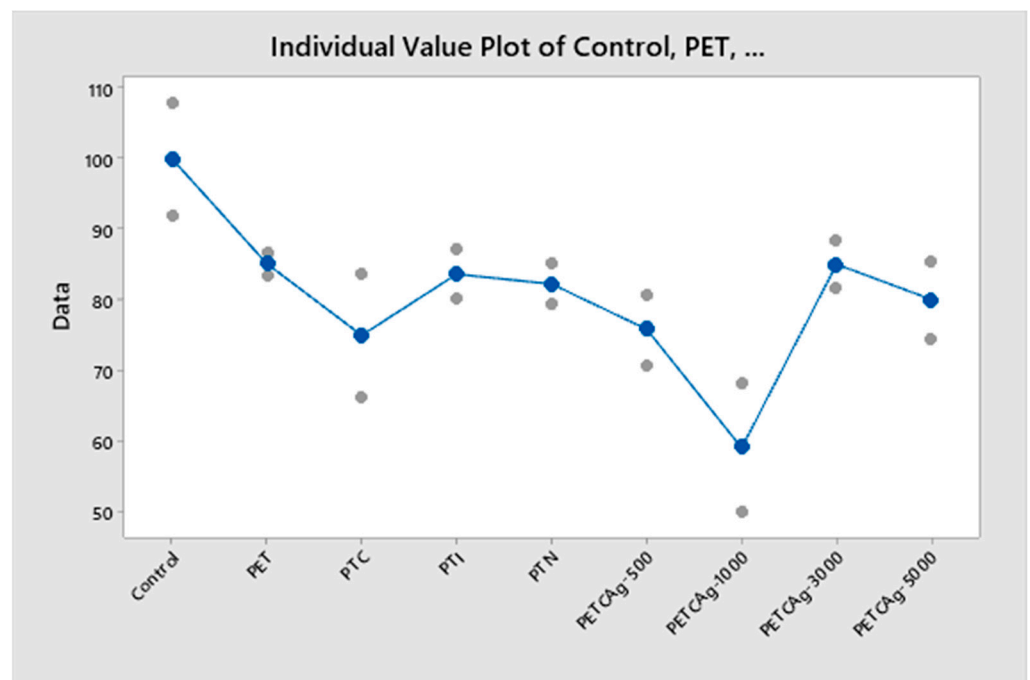

**Figure S3.** Individual value plot of control PET.

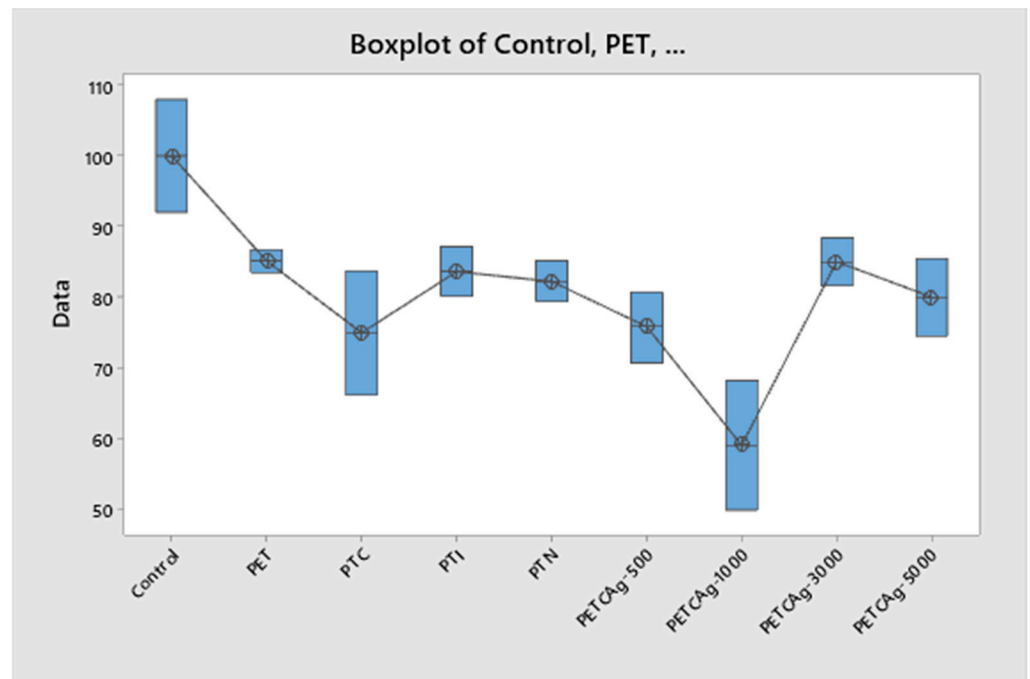

**Figure S4.** Boxplot of control PET.

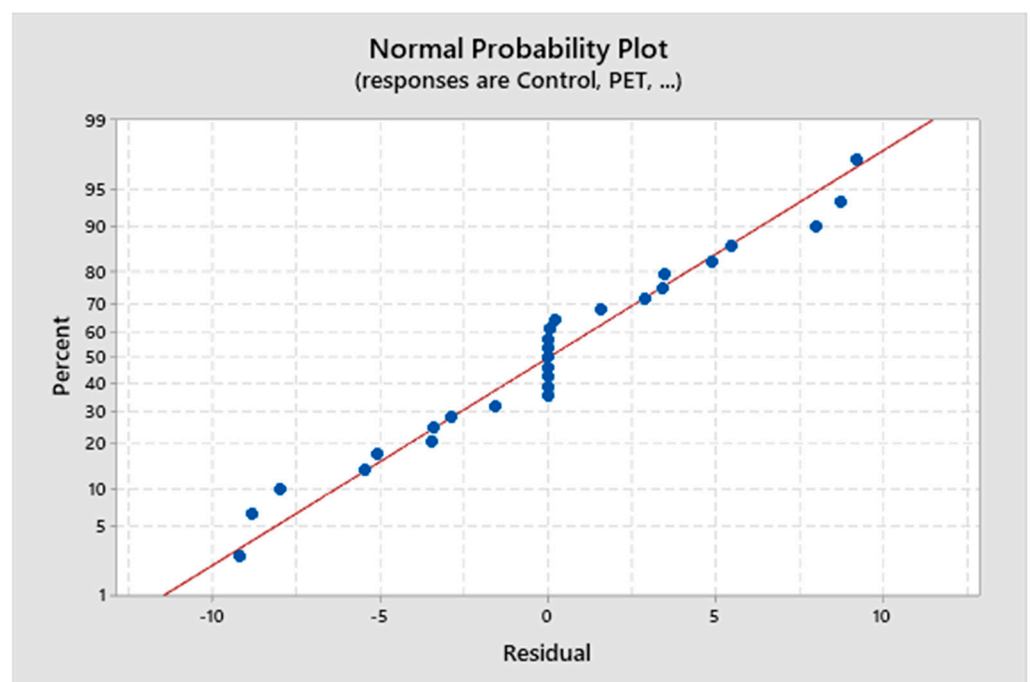

**Figure S5.** Normal Probability Plot.

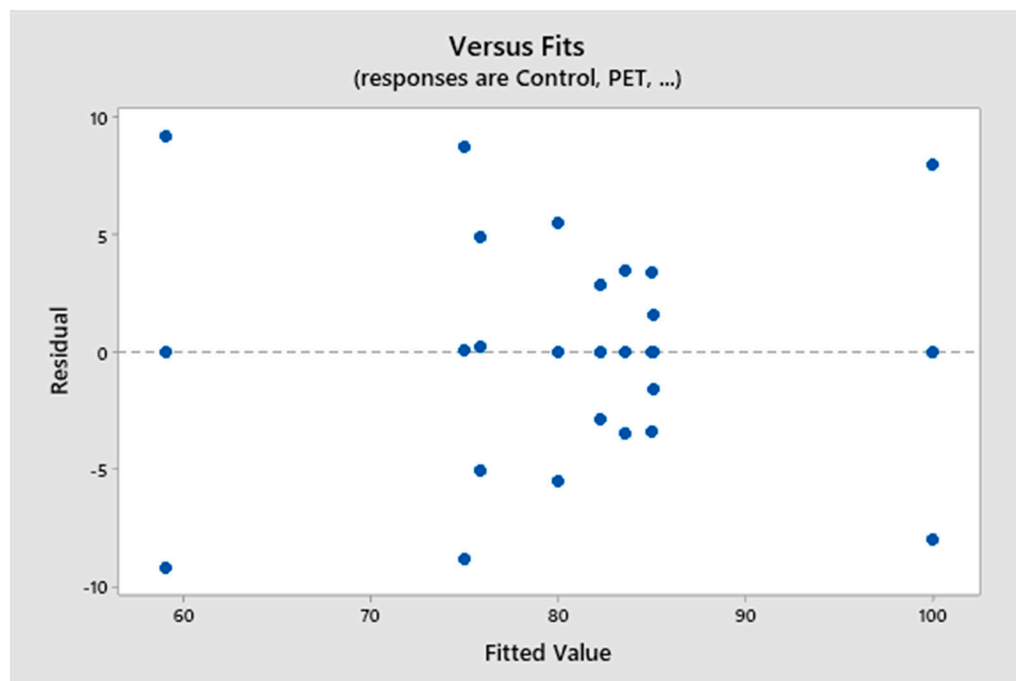

**Figure S6.** Versus fits.

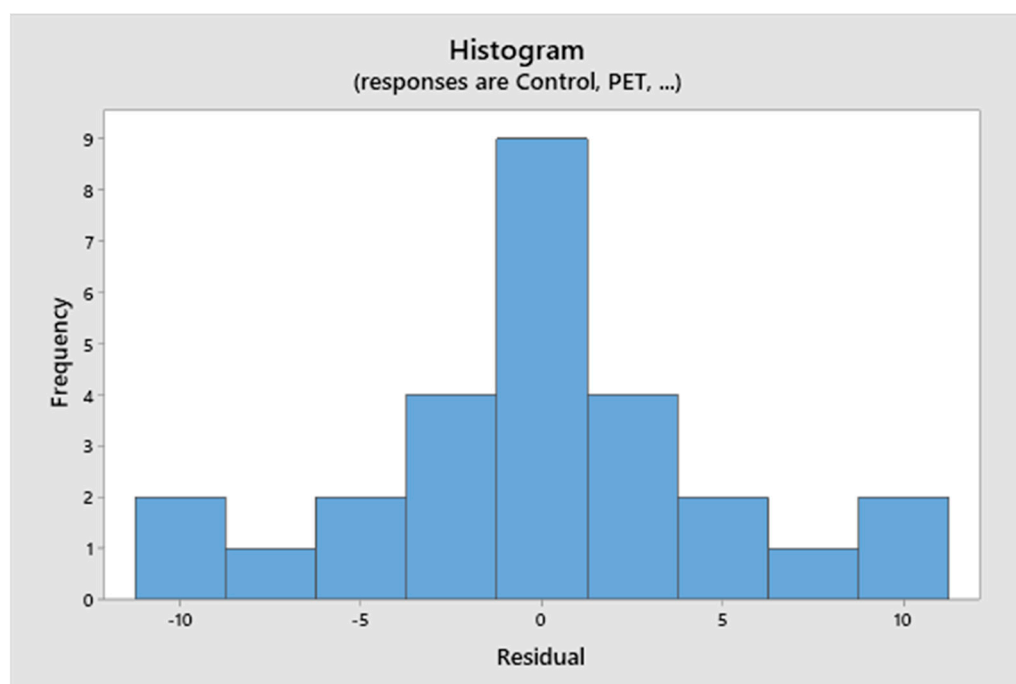

**Figure S7.** Histogram of residual values.
